# Supplementary material for: Uropathogenic E.coli (UPEC) Infection Induces Proliferation through Enhancer of Zeste Homologue 2 (EZH2)
Source: PubMed Central journal article supplement (PMC4786126; doi:10.1371/journal.pone.0149118), 2016-03-10

# S2 Fig

## A

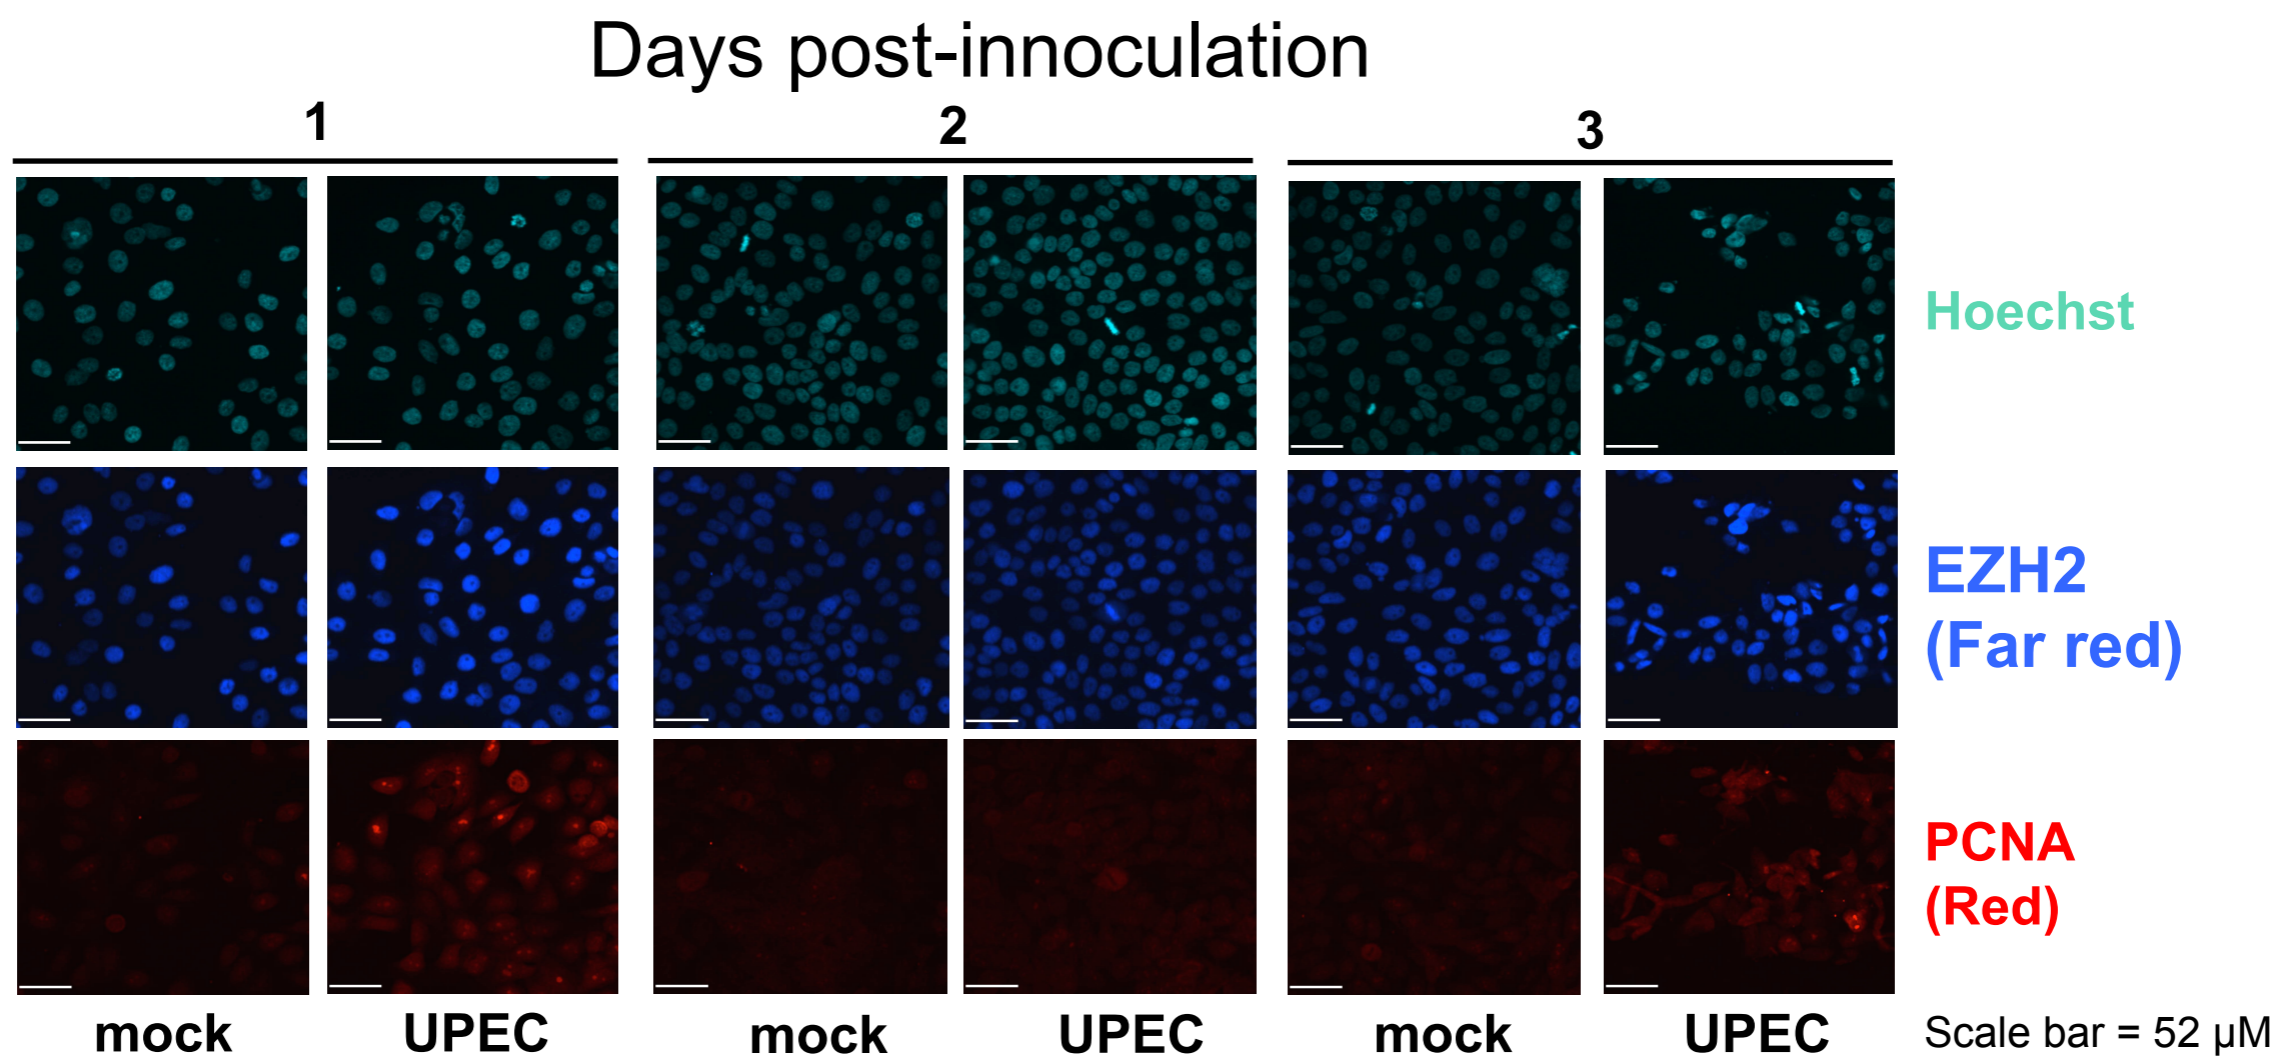

## B

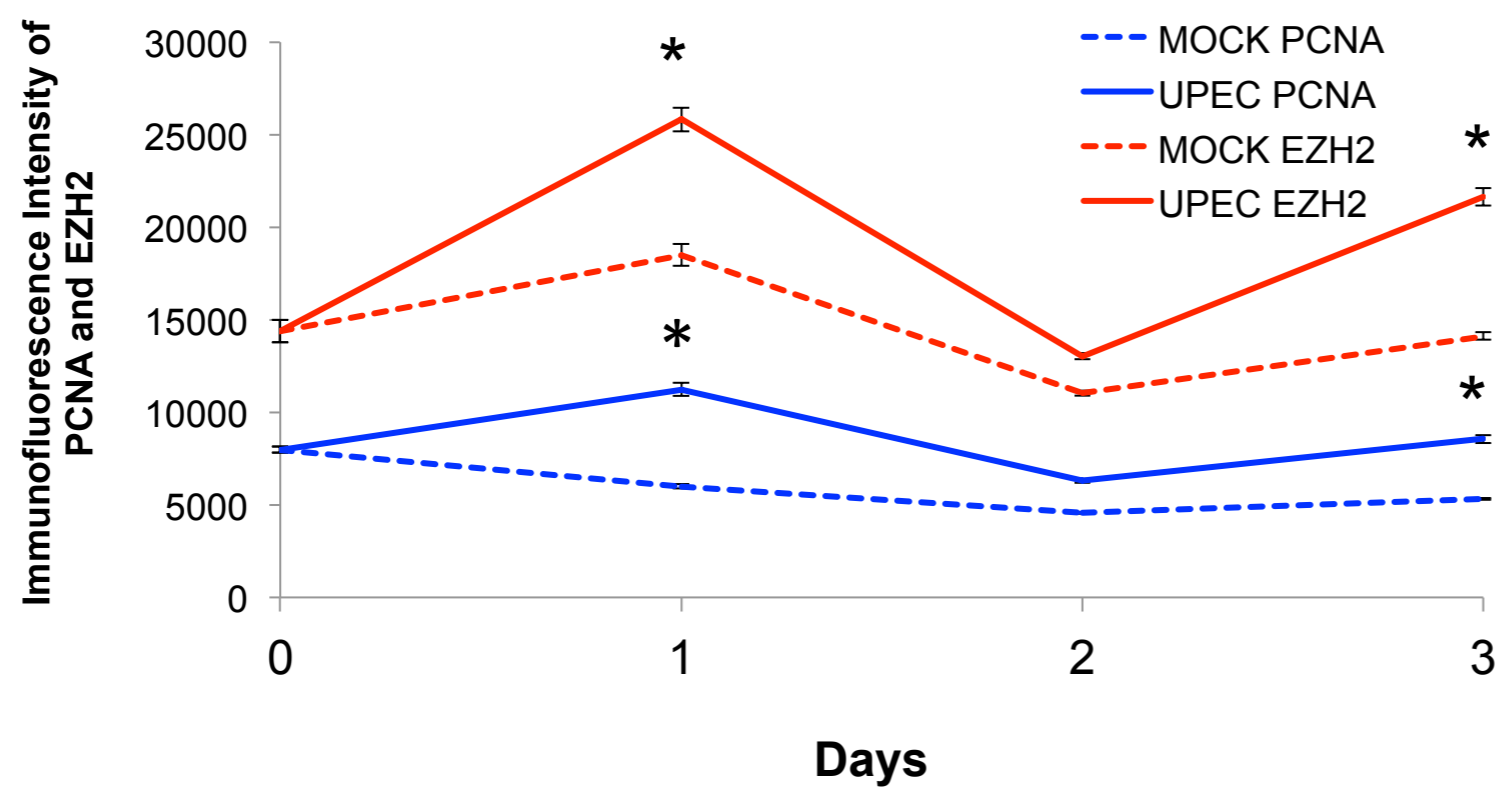

Supplement: pone.0149118.s002.pdf [file pone.0149118.s002.pdf]
