# Supplementary material for: Uropathogenic E.coli (UPEC) Infection Induces Proliferation through Enhancer of Zeste Homologue 2 (EZH2)
Source: PubMed Central journal article supplement (PMC4786126; doi:10.1371/journal.pone.0149118), 2016-03-10

# S3 Fig

Days post-innoculation

A

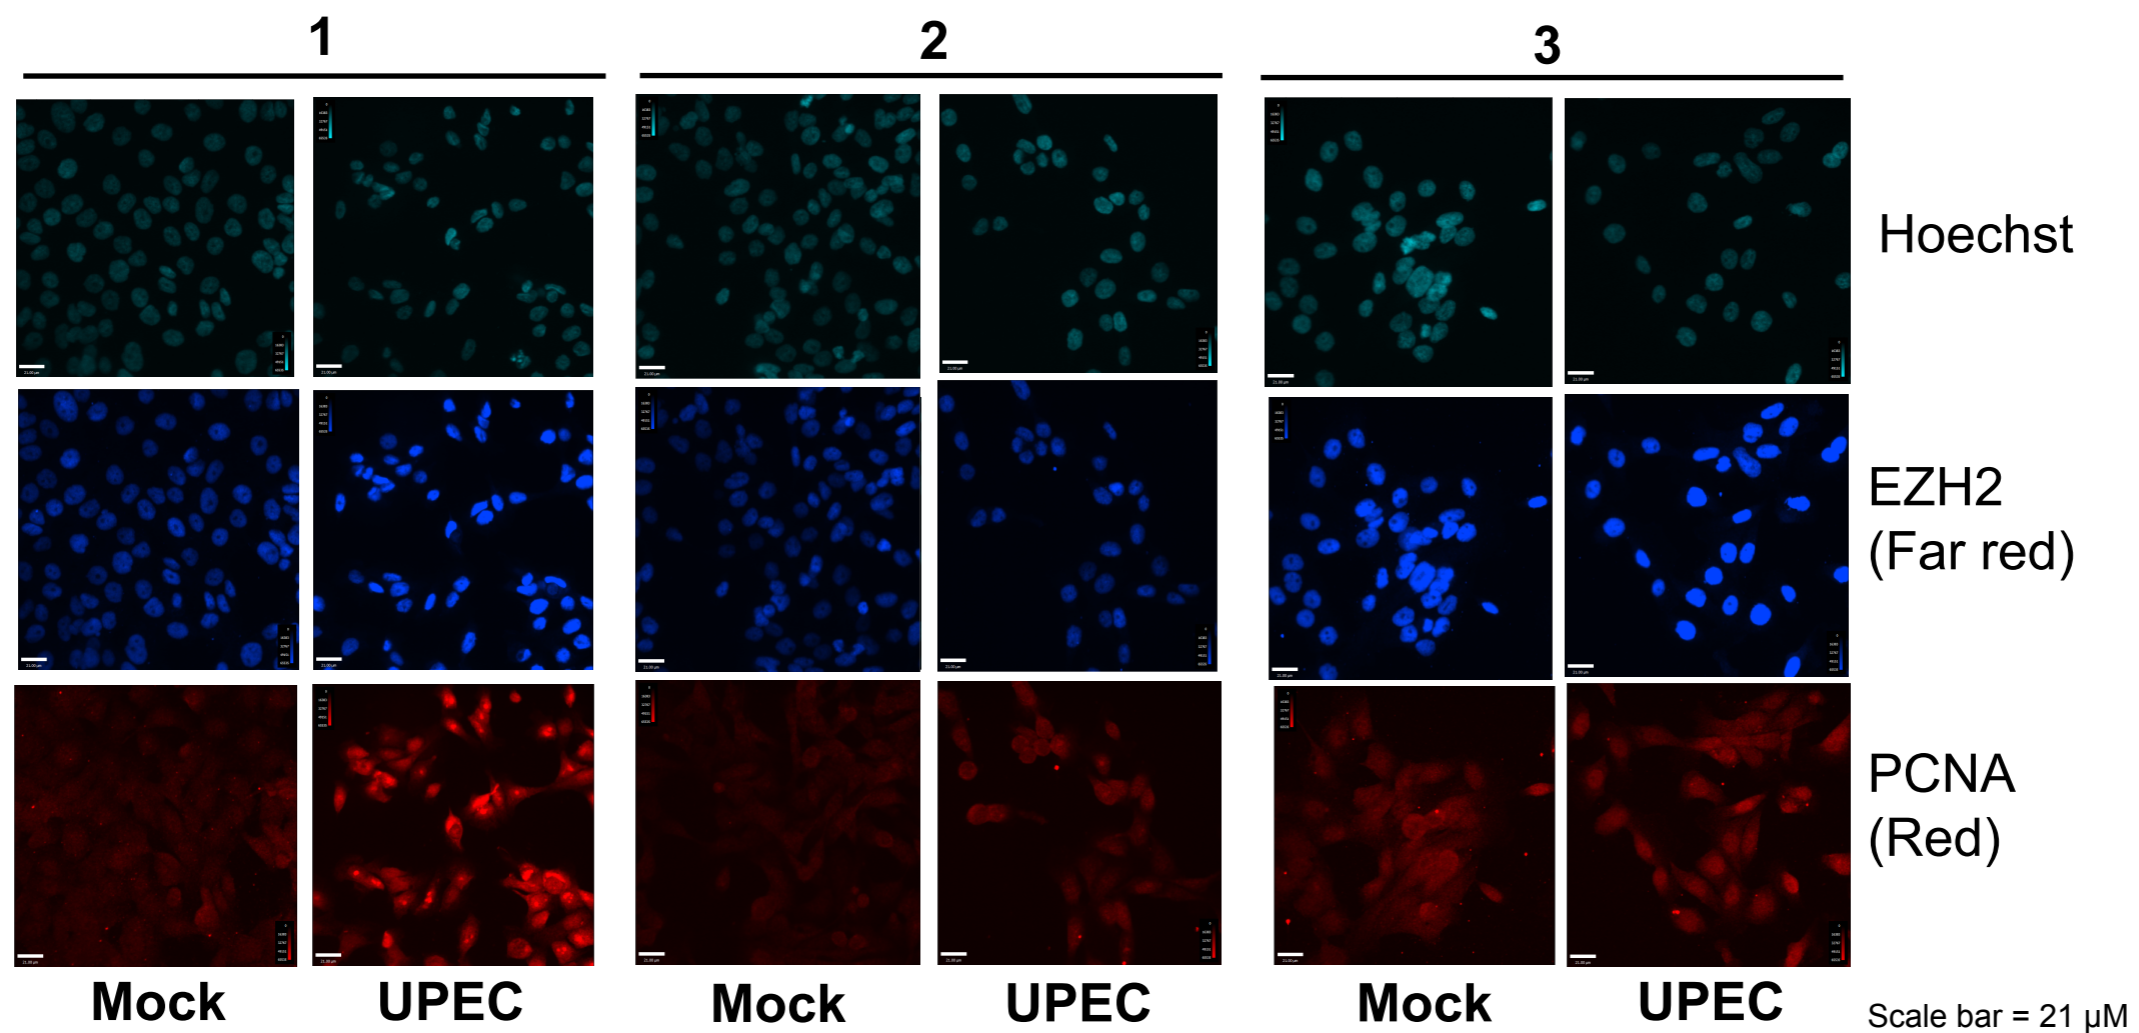

B

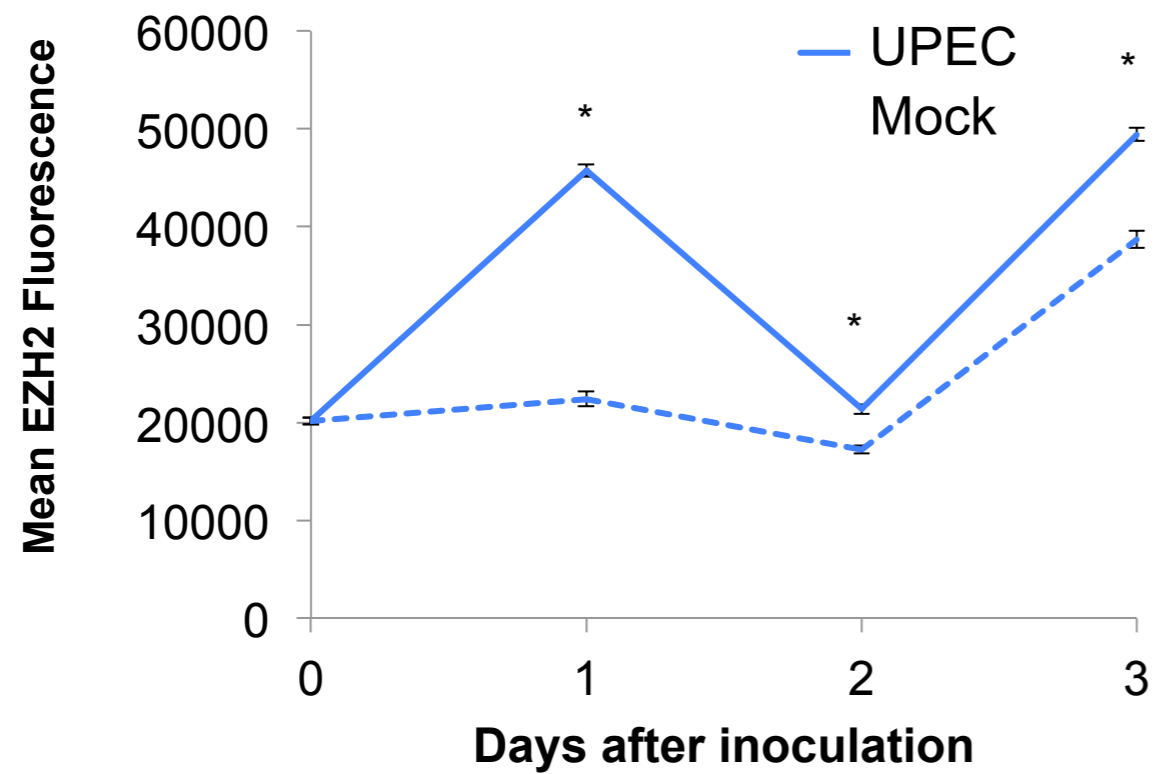

C

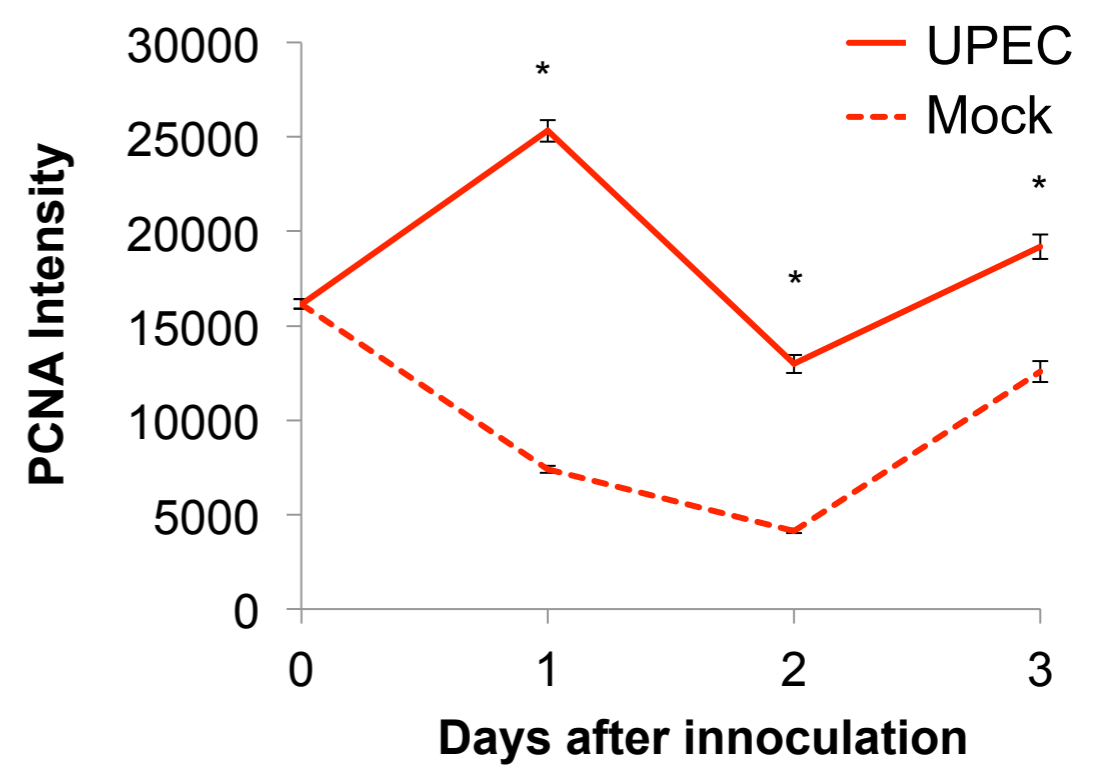

Supplement: pone.0149118.s003.pdf [file pone.0149118.s003.pdf]
