# Supplementary material for: Uropathogenic E.coli (UPEC) Infection Induces Proliferation through Enhancer of Zeste Homologue 2 (EZH2)
Source: PubMed Central journal article supplement (PMC4786126; doi:10.1371/journal.pone.0149118), 2016-03-10
Supplement: pone.0149118.s006.pdf [file pone.0149118.s006.pdf]

# S1 Table

| <b>Gene</b>      | <b>Forward Primer</b>           | <b>Reverse Primer</b>           | <b>Tm (°C)</b> | <b>Product Size (bp)</b> |
|------------------|---------------------------------|---------------------------------|----------------|--------------------------|
| GAPDH            | GTC AGT GGT GGA CCT GAC CT      | TGC TGT AGC CAA ATT CGT TG      | 56             | 147                      |
| EZH2 – isoform b | GCT TCC TAC ATC GTA AGT GCA A   | CTC CCT CCA AAT GCT GGT AAC     | 61             | 125                      |
| Wnt5a            | CTT CGC CCA GGT TGT AAT TGA AGC | CTG CCA AAA ACA GAG GTG TTA TCC | 61             | 273                      |
| RPL19            | CCA CAT GTA TCA CAG CCT GTA     | CTT GGT CTT AGA CCT GCG G       | 57             | 153                      |
